# Supplementary material
Source: Elsevier journal article supplement (https://www.sciencedirect.com/science/article/pii/S2173579418301397)
Supplement: mmc1 [file S2173579418301397:mmc1.pdf]

PB/SA

National Eye Institute  
Cuestionario sobre la función visual – 25  
(VFQ-25)

versión 2000

(CUESTIONARIO CUMPLIMENTADO POR EL  
PACIENTE)

Enero de 2000

RAND autoriza el uso el Cuestionario sobre la función visual 25 (VFQ-25) del National Eye Institute, de julio de 1996, de conformidad con las condiciones expuestas a continuación, que deberán asumir todas las partes como consecuencia de su aceptación y uso de este documento.

1. Se podrá modificar el NEI VFQ-25 (julio de 1996) sin el permiso por escrito de RAND. No obstante, tales modificaciones deberán quedar claramente identificadas como realizadas por el receptor.
2. El usuario del NEI VFQ-25 (julio de 1996) asume toda la responsabilidad (y acepta mantener indemne a RAND) por posibles inexactitudes en las traducciones de la versión del NEI VFQ-25 de julio 1996 a otros idiomas y por cualquier error, omisión o malinterpretación o las consecuencias de los mismos.
3. El usuario del NEI VFQ-25 (julio de 1996) asume toda la responsabilidad (y acepta mantener indemne a RAND) por cualquier consecuencia derivada del uso del NEI VFQ-25.
4. Al imprimir y distribuir este documento o publicar los resultados o análisis basados en este instrumento, el usuario del NEI VFQ-25 (julio de 1996) incluirá un reconocimiento de que ha sido elaborado por RAND con el patrocinio del National Eye Institute.
5. No es necesario ningún permiso adicional por escrito para utilizar este NEI VFQ-25 (julio de 1996).

29/7/96



A continuación se presenta un cuestionario con afirmaciones sobre los problemas relacionados con su visión o los sentimientos que le provoca la enfermedad ocular que padece. Después de cada pregunta, elija la respuesta que mejor describe su situación.

Responda a todas las preguntas como si llevara puestas las gafas o lentillas (si es que las utiliza).

Tómese el tiempo que necesite para responder a cada pregunta. Todas las respuestas son confidenciales. Para que este cuestionario nos permita ampliar nuestros conocimientos sobre sus problemas de visión y cómo afectan a su calidad de vida, sus respuestas deben ser lo más precisas posible. Recuerde, si utiliza gafas o lentillas, responda a todas las preguntas como si las llevara puestas.

#### INSTRUCCIONES:

1. En general, nos gustaría que los pacientes cumplimentaran estos formularios por su cuenta. Si cree que necesita asistencia, no dude en pedírsela al personal del proyecto y ellos le ayudarán.
2. Responda a todas las preguntas (salvo cuando se le indique que se salte algunas preguntas porque no son aplicables a su caso).
3. Para responder a las preguntas, rodee con un círculo el número adecuado.
4. Si no está seguro/a acerca de cómo contestar a una pregunta, elija la respuesta que considere más apropiada y escriba un comentario en el margen izquierdo.
5. Cumplimente el cuestionario antes de abandonar el centro y entrégueselo a un miembro del personal del proyecto. No se lo lleve a casa.
6. Si tiene alguna pregunta, no dude en planteársela a un miembro del personal del proyecto; estarán encantados de ayudarle.

#### DECLARACIÓN DE CONFIDENCIALIDAD:

Toda la información que permita la identificación de las personas que cumplimenten este cuestionario se considerará estrictamente confidencial. Dicha información se utilizará únicamente para los fines de este estudio y no se divulgará ni publicará para ningún otro fin sin consentimiento previo, excepto por imperativo legal.



## Cuestionario sobre la función visual - 25

### PARTE 1 - ESTADO DE SALUD GENERAL Y VISIÓN

1. En general, diría que su salud general es:

*(Rodee una de las respuestas)*

|           |   |
|-----------|---|
| Excelente | 1 |
| Muy buena | 2 |
| Buena     | 3 |
| Normal    | 4 |
| Mala      | 5 |

2. En la actualidad, ¿diría que su visión con ambos ojos (con gafas o lentillas, si las utiliza) es excelente, buena, normal, mala o muy mala o está usted totalmente ciego/a?

*(Rodee una de las respuestas)*

|               |   |
|---------------|---|
| Excelente     | 1 |
| Buena         | 2 |
| Normal        | 3 |
| Mala          | 4 |
| Muy mala      | 5 |
| Ceguera total | 6 |

3. ¿Qué parte de su tiempo se preocupa por sus problemas de visión?

(Rodee una de las respuestas)

|                            |   |
|----------------------------|---|
| Nunca . . . . .            | 1 |
| Poco tiempo . . . . .      | 2 |
| Parte del tiempo . . . . . | 3 |
| Casi siempre . . . . .     | 4 |
| Siempre . . . . .          | 5 |

4. ¿Qué grado de dolor o molestias ha tenido en los ojos y alrededor (por ejemplo, quemazón, picor o dolorimiento)? Diría que:

(Rodee una de las respuestas)

|                       |   |
|-----------------------|---|
| Nulo . . . . .        | 1 |
| Leve . . . . .        | 2 |
| Moderado . . . . .    | 3 |
| Intenso o . . . . .   | 4 |
| Muy intenso . . . . . | 5 |

PARTE 2 - DIFICULTAD PARA REALIZAR ACTIVIDADES

A continuación le haremos preguntas sobre el grado de dificultad tiene para realizar determinadas actividades llevando puestas las gafas o lentillas (en caso de que las utilice para esa actividad).

5. ¿Qué grado de dificultad tiene para leer textos en letra de tamaño normal en el periódico? Diría que:

(Rodee una de las respuestas)

|                                                                       |   |
|-----------------------------------------------------------------------|---|
| Ninguna dificultad . . . . .                                          | 1 |
| Ligera dificultad . . . . .                                           | 2 |
| Dificultad moderada . . . . .                                         | 3 |
| Dificultad extrema . . . . .                                          | 4 |
| Dejé de hacerlo por mis problemas de visión . . . . .                 | 5 |
| Dejé de hacerlo por otros motivos o no tengo interés en hacerlo . . . | 6 |

6. ¿Qué grado de dificultad tiene para trabajar o practicar aficiones para las que necesite ver bien de cerca, como cocinar, coser, hacer arreglos en casa o utilizar herramientas manuales? Diría que:

(Rodee una de las respuestas)

|                                                                           |   |
|---------------------------------------------------------------------------|---|
| Ninguna dificultad . . . . .                                              | 1 |
| Ligera dificultad . . . . .                                               | 2 |
| Dificultad moderada . . . . .                                             | 3 |
| Dificultad extrema . . . . .                                              | 4 |
| Dejé de hacerlo por mis problemas de visión . . . . .                     | 5 |
| Dejé de hacerlo por otros motivos o no tengo interés en hacerlo . . . . . | 6 |

7. Debido a sus problemas de visión, ¿tiene dificultades para encontrar lo que busca en una estantería llena?

(Rodee una de las respuestas)

|                                                                           |   |
|---------------------------------------------------------------------------|---|
| Ninguna dificultad . . . . .                                              | 1 |
| Ligera dificultad . . . . .                                               | 2 |
| Dificultad moderada . . . . .                                             | 3 |
| Dificultad extrema . . . . .                                              | 4 |
| Dejé de hacerlo por mis problemas de visión . . . . .                     | 5 |
| Dejé de hacerlo por otros motivos o no tengo interés en hacerlo . . . . . | 6 |

8. ¿Tiene dificultades para leer los letreros y señales de la calle o los nombres de las tiendas?

(Rodee una de las respuestas)

|                                                                           |   |
|---------------------------------------------------------------------------|---|
| Ninguna dificultad . . . . .                                              | 1 |
| Ligera dificultad . . . . .                                               | 2 |
| Dificultad moderada . . . . .                                             | 3 |
| Dificultad extrema . . . . .                                              | 4 |
| Dejé de hacerlo por mis problemas de visión . . . . .                     | 5 |
| Dejé de hacerlo por otros motivos o no tengo interés en hacerlo . . . . . | 6 |

9. Debido a sus problemas de visión, ¿qué grado de dificultad tiene para bajar escalones, escaleras o bordillos con poca luz o de noche?

(Rodee una de las respuestas)

|                                                                           |   |
|---------------------------------------------------------------------------|---|
| Ninguna dificultad . . . . .                                              | 1 |
| Ligera dificultad . . . . .                                               | 2 |
| Dificultad moderada . . . . .                                             | 3 |
| Dificultad extrema . . . . .                                              | 4 |
| Dejé de hacerlo por mis problemas de visión . . . . .                     | 5 |
| Dejé de hacerlo por otros motivos o no tengo interés en hacerlo . . . . . | 6 |

10. Debido a sus problemas de visión, ¿qué grado de dificultad tiene para percibir los objetos situados a los lados cuando camina?

(Rodee una de las respuestas)

|                                                                           |   |
|---------------------------------------------------------------------------|---|
| Ninguna dificultad . . . . .                                              | 1 |
| Ligera dificultad . . . . .                                               | 2 |
| Dificultad moderada . . . . .                                             | 3 |
| Dificultad extrema . . . . .                                              | 4 |
| Dejé de hacerlo por mis problemas de visión . . . . .                     | 5 |
| Dejé de hacerlo por otros motivos o no tengo interés en hacerlo . . . . . | 6 |

11. Debido a sus problemas de visión, ¿qué grado de dificultad tiene para ver cómo reacciona la gente ante las cosas que dice usted?

(Rodee una de las respuestas)

|                                                                           |   |
|---------------------------------------------------------------------------|---|
| Ninguna dificultad . . . . .                                              | 1 |
| Ligera dificultad . . . . .                                               | 2 |
| Dificultad moderada . . . . .                                             | 3 |
| Dificultad extrema . . . . .                                              | 4 |
| Dejé de hacerlo por mis problemas de visión . . . . .                     | 5 |
| Dejé de hacerlo por otros motivos o no tengo interés en hacerlo . . . . . | 6 |



12. Debido a sus problemas de visión, ¿qué grado de dificultad tiene para elegir y combinar su ropa?

(Rodee una de las respuestas)

- Ninguna dificultad ..... 1
- Ligera dificultad ..... 2
- Dificultad moderada ..... 3
- Dificultad extrema ..... 4
- Dejé de hacerlo por mis problemas de visión ..... 5
- Dejé de hacerlo por otros motivos o no tengo interés en hacerlo .... 6

13. Debido a sus problemas de visión, ¿qué grado de dificultad tiene cuando va de visita a casa de otras personas, a fiestas o a restaurantes?

(Rodee una de las respuestas)

- Ninguna dificultad ..... 1
- Ligera dificultad ..... 2
- Dificultad moderada ..... 3
- Dificultad extrema ..... 4
- Dejé de hacerlo por mis problemas de visión ..... 5
- Dejé de hacerlo por otros motivos o no tengo interés en hacerlo .... 6

14. Debido a sus problemas de visión, ¿qué grado de dificultad tiene para ir al cine, al teatro o a eventos deportivos?

(Rodee una de las respuestas)

- Ninguna dificultad ..... 1
- Ligera dificultad ..... 2
- Dificultad moderada ..... 3
- Dificultad extrema ..... 4
- Dejé de hacerlo por mis problemas de visión ..... 5
- Dejé de hacerlo por otros motivos o no tengo interés en hacerlo .... 6

15. ¿Conduce actualmente, aunque sea de vez en cuando?

(Rodee una de las respuestas)

Sí . . . . . 1 Pase a la P 15c  
No . . . . . 2

15a. EN CASO NEGATIVO: ¿No ha conducido nunca o ha dejado de conducir?

(Rodee una de las respuestas)

Nunca he conducido . 1 Pase a la parte 3, P 17  
He dejado de hacerlo . 2

15b. SI HA DEJADO DE CONDUCIR: ¿Dejó de conducir principalmente por sus problemas de visión, principalmente por otros motivos o tanto por sus problemas de visión como por otros motivos?

(Rodee una de las respuestas)

Principalmente por mis problemas de visión . . 1 Pase a la parte 3, P 17  
Principalmente por otros motivos . . . . . 2 Pase a la parte 3, P 17  
Tanto por mis problemas de visión como por  
otros motivos . . . . . 3 Pase a la parte 3, P 17

15c. SI CONDUCE ACTUALMENTE: ¿Qué grado de dificultad tiene para conducir durante el día en lugares que conoce? Diría que:

(Rodee una de las respuestas)

Ninguna dificultad . . . . . 1  
Ligera dificultad . . . . . 2  
Dificultad moderada . . . . . 3  
Dificultad extrema . . . . . 4

**16. ¿Qué grado de dificultad tiene para conducir de noche? Diría que:**

*(Rodee una de las respuestas)*

- Ninguna dificultad . . . . . **1**
- Ligera dificultad . . . . . **2**
- Dificultad moderada . . . . . **3**
- Dificultad extrema . . . . . **4**
- He dejado de hacerlo por mis problemas de visión . . . **5**
- He dejado de hacerlo por otros motivos o no  
tengo interés en hacerlo . . . . . **6**

**16A. ¿Qué grado de dificultad tiene para conducir en condiciones adversas, por ejemplo, con mal tiempo, en hora punta, por la autopista o con tráfico en la ciudad? Diría que:**

*(Rodee una de las respuestas)*

- Ninguna dificultad . . . . . **1**
- Ligera dificultad . . . . . **2**
- Dificultad moderada . . . . . **3**
- Dificultad extrema . . . . . **4**
- He dejado de hacerlo por mis problemas de visión . . . **5**
- He dejado de hacerlo por otros motivos o no  
tengo interés en hacerlo . . . . . **6**

## PARTE 3: RESPUESTAS A LOS PROBLEMAS DE VISIÓN

A continuación le haremos preguntas sobre cómo afectan sus problemas de visión a sus actividades. En cada una, rodee un número con un círculo para indicar si en su caso la afirmación se cumple siempre, casi siempre, parte del tiempo, poco tiempo o nunca.

| LEA LAS CATEGORÍAS:                                                                                                                                                        | (Rodee una puntuación de cada fila) |              |                  |             |       |
|----------------------------------------------------------------------------------------------------------------------------------------------------------------------------|-------------------------------------|--------------|------------------|-------------|-------|
|                                                                                                                                                                            | Siempre                             | Casi siempre | Parte del tiempo | Poco tiempo | Nunca |
| 17. ¿ <u>Hace menos cosas</u> de las que le gustaría por sus problemas de visión?                                                                                          | 1                                   | 2            | 3                | 4           | 5     |
| 18. ¿ <u>Ve limitado</u> el tiempo que puede dedicar al trabajo o a otras actividades por sus problemas de visión?                                                         | 1                                   | 2            | 3                | 4           | 5     |
| 19. ¿Hasta qué punto le impiden el dolor o las molestias <u>en los ojos o alrededor</u> (por ejemplo, quemazón, picor o dolorimiento) hacer lo que le gustaría? Diría que: | 1                                   | 2            | 3                | 4           | 5     |

A continuación le presentamos una serie de afirmaciones. Rodee el número correspondientes para indicar si en su caso la afirmación es totalmente cierta, esencialmente cierta, esencialmente falsa o totalmente falsa o si no está seguro/a.

(Rodee una puntuación en cada fila)

|                                                                                                         | Totalmente<br>cierto | Esencial<br>mente<br>cierto | No estoy<br>seguro/a | Esencial<br>mente<br>falso | Totalmente<br>falso |
|---------------------------------------------------------------------------------------------------------|----------------------|-----------------------------|----------------------|----------------------------|---------------------|
| 20. <u>Paso en casa la mayor parte del tiempo</u> por mis problemas de visión                           | 1                    | 2                           | 3                    | 4                          | 5                   |
| 21. Me siento <u>frustrado/a</u> con frecuencia por mis problemas de visión                             | 1                    | 2                           | 3                    | 4                          | 5                   |
| 22. Tengo <u>mucho menos control</u> sobre lo que hago por mis problemas de visión                      | 1                    | 2                           | 3                    | 4                          | 5                   |
| 23. Debido a mis problemas de visión, <u>dependo demasiado de lo que me dicen otras personas</u>        | 1                    | 2                           | 3                    | 4                          | 5                   |
| 24. <u>Necesito mucha ayuda</u> de otras personas por mis problemas de visión                           | 1                    | 2                           | 3                    | 4                          | 5                   |
| 25. Me preocupa <u>hacer cosas que me avergüencen o avergüencen a otros</u> por mis problemas de visión | 1                    | 2                           | 3                    | 4                          | 5                   |

## Apéndice con preguntas adicionales opcionales

### SUBESCALA: SALUD GENERAL

- A1. ¿Cómo calificaría su salud general, en una escala en la que el cero es la peor posible, como la muerte, y el 10 es el mejor estado de salud posible?

(Rodee una de las respuestas)

|      |   |   |   |   |   |   |   |   |   |       |
|------|---|---|---|---|---|---|---|---|---|-------|
| 0    | 1 | 2 | 3 | 4 | 5 | 6 | 7 | 8 | 9 | 10    |
| Peor |   |   |   |   |   |   |   |   |   | Mejor |

### SUBESCALA: VISIÓN GENERAL

- A2. ¿Cómo calificaría su visión actual (con gafas o lentillas, si las lleva), en una escala de 0 a 10, en la que el cero es la peor visión posible, igual o peor que la ceguera, y el 10 significa la mejor visión posible?

(Rodee una de las respuestas)

|      |   |   |   |   |   |   |   |   |   |       |
|------|---|---|---|---|---|---|---|---|---|-------|
| 0    | 1 | 2 | 3 | 4 | 5 | 6 | 7 | 8 | 9 | 10    |
| Peor |   |   |   |   |   |   |   |   |   | Mejor |

### SUBESCALA: VISIÓN CERCANA

- A3. Con las gafas puestas, ¿tiene dificultades para leer la letra pequeña de una guía de teléfonos, el envase de un medicamento o los formularios administrativos? Diría que:

(Rodee una de las respuestas)

|                                                                         |   |
|-------------------------------------------------------------------------|---|
| Ninguna dificultad . . . . .                                            | 1 |
| Ligera dificultad . . . . .                                             | 2 |
| Dificultad moderada . . . . .                                           | 3 |
| Dificultad extrema . . . . .                                            | 4 |
| Dejé de hacerlo por mis problemas de visión . . . . .                   | 5 |
| Dejé de hacerlo por otros motivos o no tengo interés en hacerlo . . . . | 6 |

**A4. Debido a sus problemas de visión, ¿qué grado de dificultad tiene para comprobar si las facturas que recibe son correctas?**

*(Rodee una de las respuestas)*

- Ninguna dificultad ..... 1
- Ligera dificultad ..... 2
- Dificultad moderada ..... 3
- Dificultad extrema ..... 4
- Dejé de hacerlo por mis problemas de visión ..... 5
- Dejé de hacerlo por otros motivos o no tengo interés en hacerlo .... 6

**A5. Debido a sus problemas de visión, ¿qué grado de dificultad tiene para llevar a cabo actividades como afeitarse, arreglarse el pelo o maquillarse?**

*(Rodee una de las respuestas)*

- Ninguna dificultad ..... 1
- Ligera dificultad ..... 2
- Dificultad moderada ..... 3
- Dificultad extrema ..... 4
- Dejé de hacerlo por mis problemas de visión ..... 5
- Dejé de hacerlo por otros motivos o no tengo interés en hacerlo .... 6

**SUBESCALA: VISIÓN LEJANA**

**A6. Debido a sus problemas de visión, ¿qué grado de dificultad tiene para reconocer a personas que conoce desde el otro extremo de una habitación?**

*(Rodee una de las respuestas)*

- Ninguna dificultad ..... 1
- Ligera dificultad ..... 2
- Dificultad moderada ..... 3
- Dificultad extrema ..... 4
- Dejé de hacerlo por mis problemas de visión ..... 5
- Dejé de hacerlo por otros motivos o no tengo interés en hacerlo .... 6

**A7. Debido a sus problemas de visión, ¿qué grado de dificultad tiene para participar en deportes activos u otras actividades al aire libre que le gusten (como jugar al golf, ir a la bolera, salir a correr o caminar)?**

*(Rodee una de las respuestas)*

- Ninguna dificultad . . . . . 1
- Ligera dificultad . . . . . 2
- Dificultad moderada . . . . . 3
- Dificultad extrema . . . . . 4
- Dejé de hacerlo por mis problemas de visión . . . . . 5
- Dejé de hacerlo por otros motivos o no tengo interés en hacerlo . . . . 6

**A8. Debido a sus problemas de visión, ¿tiene dificultades para ver y disfrutar de programa de televisión?**

*(Rodee una de las respuestas)*

- Ninguna dificultad . . . . . 1
- Ligera dificultad . . . . . 2
- Dificultad moderada . . . . . 3
- Dificultad extrema . . . . . 4
- Dejé de hacerlo por mis problemas de visión . . . . . 5
- Dejé de hacerlo por otros motivos o no tengo interés en hacerlo . . . . 6

**SUBESCALA: FUNCIÓN SOCIAL**

**A9. Debido a sus problemas de visión, ¿tiene dificultades para celebrar reuniones con amigos y familiares en su casa?**

*(Rodee una de las respuestas)*

- Ninguna dificultad . . . . . 1
- Ligera dificultad . . . . . 2
- Dificultad moderada . . . . . 3
- Dificultad extrema . . . . . 4
- Dejé de hacerlo por mis problemas de visión . . . . . 5
- Dejé de hacerlo por otros motivos o no tengo interés en hacerlo . . . . 6



## SUBESCALA: CONDUCCIÓN

**A10. [Este punto, “conducción en condiciones adversas”, se ha incluido como punto 16a en el juego básico de 25 puntos.]**

## SUBESCALA: LIMITACIÓN DE ROLES

**A11. A continuación le haremos preguntas sobre cosas que es posible que haga debido a sus problemas de visión. En cada una, rodee el número correspondiente para indicar si en su caso esta afirmación se cumple siempre, casi siempre, parte del tiempo, poco tiempo o nunca.**

*(Rodee una puntuación en cada fila)*

|                                                                                              | Siempre | Casi siempre | Parte del tiempo | Poco tiempo | Nunca |
|----------------------------------------------------------------------------------------------|---------|--------------|------------------|-------------|-------|
| a. <u>¿Necesita más ayuda</u> de otras personas por sus problemas de visión?                 | 1       | 2            | 3                | 4           | 5     |
| b. <u>¿Se ve limitado/a</u> en el tipo de cosas que puede hacer por sus problemas de visión? | 1       | 2            | 3                | 4           | 5     |

SUBESCALAS: BIENESTAR/SUFRIMIENTO (A12) y DEPENDENCIA (A13)

**A continuación le haremos preguntas sobre cómo convive con sus problemas de visión. Le presentamos una serie de afirmaciones. Rodee el número correspondiente para indicar si en su caso la afirmación es totalmente cierta, esencialmente cierta, esencialmente falsa o totalmente falsa o si no lo sabe.**

*(Rodee una puntuación en cada fila)*

|                                                                 | Totalmente<br>cierto | Esencial<br>mente<br>cierto | No estoy<br>seguro/a | Esencial<br>mente<br>falso | Totalmente<br>falso |
|-----------------------------------------------------------------|----------------------|-----------------------------|----------------------|----------------------------|---------------------|
| A12. Suelo estar <u>irritable</u> por mis problemas de visión   | 1                    | 2                           | 3                    | 4                          | 5                   |
| A13. <u>No salgo de casa solo/a</u> por mis problemas de visión | 1                    | 2                           | 3                    | 4                          | 5                   |
